# Supplementary material for: TAL Effector Specificity for base 0 of the DNA Target Is Altered in a Complex, Effector- and Assay-Dependent Manner by Substitutions for the Tryptophan in Cryptic Repeat –1
Source: PubMed Central journal article supplement (PMC3849474; doi:10.1371/journal.pone.0082120), 2013-12-03
Supplement: pone.0082120.s002.pdf [file pone.0082120.s002.pdf]

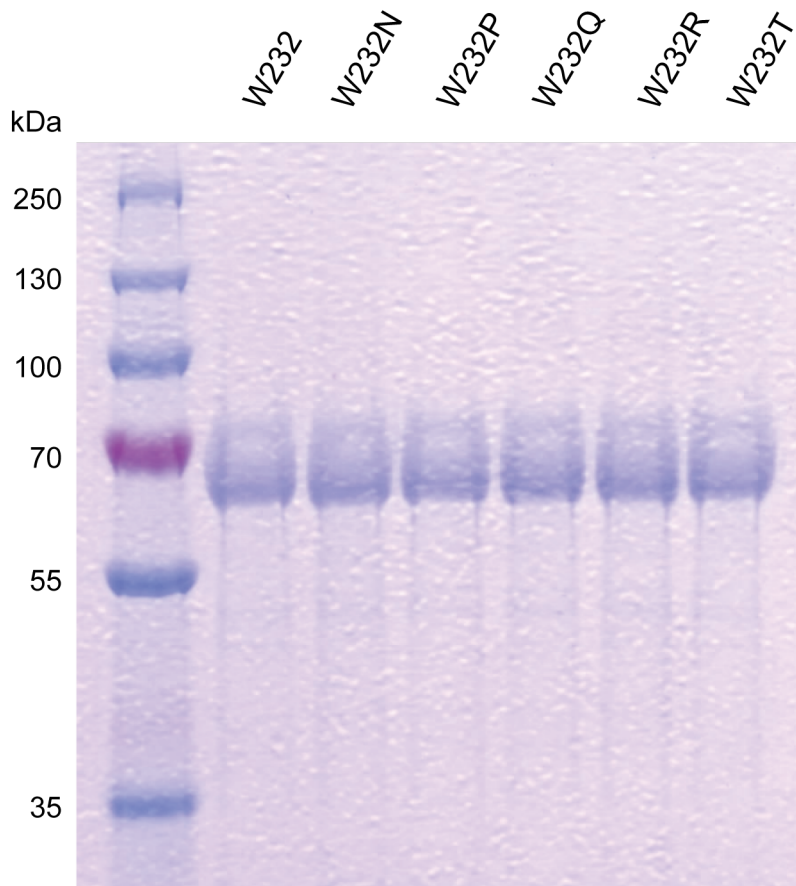

**Figure S1.** Purified TAL868 (W232) and amino acid substitution variants separated by SDS PAGE and visualized by Coomassie blue staining.
