# Supplementary material for: TAL Effector Specificity for base 0 of the DNA Target Is Altered in a Complex, Effector- and Assay-Dependent Manner by Substitutions for the Tryptophan in Cryptic Repeat –1
Source: PubMed Central journal article supplement (PMC3849474; doi:10.1371/journal.pone.0082120), 2013-12-03
Supplement: pone.0082120.s012.pdf [file pone.0082120.s012.pdf]

**Table S6. Differences in size of effects on GUS activity between W232 substitution variants co-delivered with targets with 0<sup>th</sup> position A, C, G, or T, and the wild type TAL effector co-delivered with the target with 0<sup>th</sup> position T.**

| Treatment A                     | Treatment B        | Estimate <sup>1</sup> | SE <sup>2</sup> | Z statistic <sup>3</sup> | p-value <sup>4</sup> |
|---------------------------------|--------------------|-----------------------|-----------------|--------------------------|----------------------|
| <b>EBE_868-A + TAL868</b>       | EBE_868-T + TAL868 | -39.0658              | 26.2165         | -1.4901                  | 0.1362               |
| <b>EBE_868-C + TAL868</b>       | EBE_868-T + TAL868 | -72.8951              | 26.2165         | -2.7805                  | 0.0054               |
| <b>EBE_868-G + TAL868</b>       | EBE_868-T + TAL868 | -71.5824              | 27.6766         | -2.5864                  | 0.0097               |
| <b>EBE_868-A + TAL868 W232N</b> | EBE_868-T + TAL868 | -53.7488              | 30.9293         | -1.7378                  | 0.0822               |
| <b>EBE_868-C + TAL868 W232N</b> | EBE_868-T + TAL868 | -73.4265              | 30.9293         | -2.374                   | 0.0176               |
| <b>EBE_868-G + TAL868 W232N</b> | EBE_868-T + TAL868 | -53.6073              | 30.9293         | -1.7332                  | 0.0831               |
| <b>EBE_868-T + TAL868 W232N</b> | EBE_868-T + TAL868 | -36.3226              | 30.9293         | -1.1744                  | 0.2402               |
| <b>EBE_868-A + TAL868 W232P</b> | EBE_868-T + TAL868 | -40.9093              | 26.0485         | -1.5705                  | 0.1163               |
| <b>EBE_868-C + TAL868 W232P</b> | EBE_868-T + TAL868 | -46.8908              | 26.0485         | -1.8001                  | 0.0718               |
| <b>EBE_868-G + TAL868 W232P</b> | EBE_868-T + TAL868 | -36.2964              | 26.718          | -1.3585                  | 0.1743               |
| <b>EBE_868-T + TAL868 W232P</b> | EBE_868-T + TAL868 | -48.3547              | 26.0485         | -1.8563                  | 0.0634               |
| <b>EBE_868-A + TAL868 W232Q</b> | EBE_868-T + TAL868 | -60.132               | 26.5882         | -2.2616                  | 0.0237               |
| <b>EBE_868-C + TAL868 W232Q</b> | EBE_868-T + TAL868 | -78.577               | 26.5882         | -2.9553                  | 0.0031               |
| <b>EBE_868-G + TAL868 W232Q</b> | EBE_868-T + TAL868 | -43.2408              | 26.5882         | -1.6263                  | 0.1039               |
| <b>EBE_868-T + TAL868 W232Q</b> | EBE_868-T + TAL868 | -32.6187              | 26.5882         | -1.2268                  | 0.2199               |

|                                        |                          |           |         |         |        |
|----------------------------------------|--------------------------|-----------|---------|---------|--------|
| <b>EBE_868-A +<br/>TAL868 W232R</b>    | EBE_868-T + TAL868       | -16.1969  | 23.5754 | -0.687  | 0.4921 |
| <b>EBE_868-C +<br/>TAL868 W232R</b>    | EBE_868-T + TAL868       | -22.9675  | 23.5754 | -0.9742 | 0.3299 |
| <b>EBE_868-G +<br/>TAL868 W232R</b>    | EBE_868-T + TAL868       | -8.8294   | 23.5754 | -0.3745 | 0.708  |
| <b>EBE_868-T +<br/>TAL868 W232R</b>    | EBE_868-T + TAL868       | -3.4251   | 23.5754 | -0.1453 | 0.8845 |
| <b>EBE_868-A +<br/>TAL868 W232T</b>    | EBE_868-T + TAL868       | -42.3792  | 26.1993 | -1.6176 | 0.1058 |
| <b>EBE_868-C +<br/>TAL868 W232T</b>    | EBE_868-T + TAL868       | -70.992   | 26.1993 | -2.7097 | 0.0067 |
| <b>EBE_868-G +<br/>TAL868 W232T</b>    | EBE_868-T + TAL868       | -65.5607  | 26.1993 | -2.5024 | 0.0123 |
| <b>EBE_868-T +<br/>TAL868 W232T</b>    | EBE_868-T + TAL868       | -40.4707  | 26.1993 | -1.5447 | 0.1224 |
| <b>EBE_868-A</b>                       | EBE_868-T + TAL868       | -124.1506 | 26.2165 | -4.7356 | 0      |
| <b>EBE_868-C</b>                       | EBE_868-T + TAL868       | -122.3079 | 26.2165 | -4.6653 | 0      |
| <b>EBE_868-G</b>                       | EBE_868-T + TAL868       | -124.1598 | 26.2165 | -4.7359 | 0      |
| <b>EBE_868-T</b>                       | EBE_868-T + TAL868       | -74.3929  | 16.9793 | -4.3814 | 0      |
| <b>EBE_PthXo1-A +<br/>PthXo1</b>       | EBE_PthXo1-T +<br>PthXo1 | -10.56    | 19.0896 | -0.5532 | 0.5801 |
| <b>EBE_PthXo1-C +<br/>PthXo1</b>       | EBE_PthXo1-T +<br>PthXo1 | -26.1776  | 19.0896 | -1.3713 | 0.1703 |
| <b>EBE_PthXo1-G +<br/>PthXo1</b>       | EBE_PthXo1-T +<br>PthXo1 | -20.0229  | 19.0896 | -1.0489 | 0.2942 |
| <b>EBE_PthXo1-A +<br/>PthXo1 W232N</b> | EBE_PthXo1-T +<br>PthXo1 | -32.9886  | 22.5038 | -1.4659 | 0.1427 |
| <b>EBE_PthXo1-C +<br/>PthXo1 W232N</b> | EBE_PthXo1-T +<br>PthXo1 | -35.1768  | 22.4303 | -1.5683 | 0.1168 |
| <b>EBE_PthXo1-G +<br/>PthXo1 W232N</b> | EBE_PthXo1-T +<br>PthXo1 | -2.2242   | 22.4303 | -0.0992 | 0.921  |

|                                        |                          |          |         |         |        |
|----------------------------------------|--------------------------|----------|---------|---------|--------|
| <b>EBE_PthXo1-T +<br/>PthXo1 W232N</b> | EBE_PthXo1-T +<br>PthXo1 | -26.8823 | 22.8873 | -1.1746 | 0.2402 |
| <b>EBE_PthXo1-A +<br/>PthXo1 W232P</b> | EBE_PthXo1-T +<br>PthXo1 | -6.2397  | 18.8549 | -0.3309 | 0.7407 |
| <b>EBE_PthXo1-C +<br/>PthXo1 W232P</b> | EBE_PthXo1-T +<br>PthXo1 | 4.9183   | 18.8549 | 0.2609  | 0.7942 |
| <b>EBE_PthXo1-G +<br/>PthXo1 W232P</b> | EBE_PthXo1-T +<br>PthXo1 | 3.1788   | 18.8549 | 0.1686  | 0.8661 |
| <b>EBE_PthXo1-T +<br/>PthXo1 W232P</b> | EBE_PthXo1-T +<br>PthXo1 | -32.4305 | 18.8549 | -1.72   | 0.0854 |
| <b>EBE_PthXo1-A +<br/>PthXo1 W232Q</b> | EBE_PthXo1-T +<br>PthXo1 | -12.6554 | 22.2111 | -0.5698 | 0.5688 |
| <b>EBE_PthXo1-C +<br/>PthXo1 W232Q</b> | EBE_PthXo1-T +<br>PthXo1 | -10.2513 | 22.2111 | -0.4615 | 0.6444 |
| <b>EBE_PthXo1-G +<br/>PthXo1 W232Q</b> | EBE_PthXo1-T +<br>PthXo1 | 70.4372  | 22.2111 | 3.1713  | 0.0015 |
| <b>EBE_PthXo1-T +<br/>PthXo1 W232Q</b> | EBE_PthXo1-T +<br>PthXo1 | -23.5981 | 22.2111 | -1.0624 | 0.288  |
| <b>EBE_PthXo1-A +<br/>PthXo1 W232R</b> | EBE_PthXo1-T +<br>PthXo1 | 48.1952  | 25.4413 | 1.8944  | 0.0582 |
| <b>EBE_PthXo1-C +<br/>PthXo1 W232R</b> | EBE_PthXo1-T +<br>PthXo1 | 20.5489  | 25.4413 | 0.8077  | 0.4193 |
| <b>EBE_PthXo1-G +<br/>PthXo1 W232R</b> | EBE_PthXo1-T +<br>PthXo1 | -18.1949 | 25.4413 | -0.7152 | 0.4745 |
| <b>EBE_PthXo1-T +<br/>PthXo1 W232R</b> | EBE_PthXo1-T +<br>PthXo1 | -19.3732 | 25.4413 | -0.7615 | 0.4464 |
| <b>EBE_PthXo1-A +<br/>PthXo1 W232T</b> | EBE_PthXo1-T +<br>PthXo1 | -35.9634 | 18.6278 | -1.9306 | 0.0535 |
| <b>EBE_PthXo1-C +<br/>PthXo1 W232T</b> | EBE_PthXo1-T +<br>PthXo1 | -40.7395 | 18.6278 | -2.187  | 0.0287 |
| <b>EBE_PthXo1-G +<br/>PthXo1 W232T</b> | EBE_PthXo1-T +<br>PthXo1 | -29.2283 | 18.6278 | -1.5691 | 0.1166 |
| <b>EBE_PthXo1-T +<br/>PthXo1 W232T</b> | EBE_PthXo1-T +<br>PthXo1 | -47.0892 | 18.8299 | -2.5008 | 0.0124 |

|                     |                          |          |         |         |        |
|---------------------|--------------------------|----------|---------|---------|--------|
| <b>EBE_PthXo1-A</b> | EBE_PthXo1-T +<br>PthXo1 | -79.4279 | 52.4067 | -1.5156 | 0.1296 |
| <b>EBE_PthXo1-C</b> | EBE_PthXo1-T +<br>PthXo1 | -80.0302 | 52.4067 | -1.5271 | 0.1267 |
| <b>EBE_PthXo1-G</b> | EBE_PthXo1-T +<br>PthXo1 | -63.9657 | 52.4067 | -1.2206 | 0.2223 |
| <b>EBE_PthXo1-T</b> | EBE_PthXo1-T +<br>PthXo1 | -49.4419 | 14.7853 | -3.344  | 0.0008 |

<sup>1</sup> Estimated difference between the effect sizes of Treatment A and Treatment B on GUS activity. Estimate<0 indicates Treatment A has a smaller effect on GUS activity than Treatment B. Estimate>0 indicates that Treatment A has a larger effect on GUS activity than Treatment B.

<sup>2</sup> Standard Error for the estimated difference in effect sizes computed by the general linear hypothesis test.

<sup>3</sup> Z statistic For the general linear hypothesis test of the null hypothesis that the expected value of the effect size of Treatment A is equal to the expected value of the effect size of Treatment B.

<sup>4</sup> *p*-value for the general linear hypothesis test of the null hypothesis that the expected value of the effect size of Treatment A is equal to the expected value of the effect size of Treatment B.
