# Supplementary material for: TAL Effector Specificity for base 0 of the DNA Target Is Altered in a Complex, Effector- and Assay-Dependent Manner by Substitutions for the Tryptophan in Cryptic Repeat –1
Source: PubMed Central journal article supplement (PMC3849474; doi:10.1371/journal.pone.0082120), 2013-12-03
Supplement: pone.0082120.s013.pdf [file pone.0082120.s013.pdf]

**Table S7. Differences in size of effects on GUS activity between W232 substitution variants co-delivered with targets with 0<sup>th</sup> position A, C, or G, and the same TAL effector co-delivered with the target with 0<sup>th</sup> position T, used to determine specificity for the 0<sup>th</sup> position.**

| Treatment A                         | Treatment B                         | Estimate <sup>1</sup> | SE <sup>2</sup> | Z-statistic <sup>3</sup> | p-value <sup>4</sup> |
|-------------------------------------|-------------------------------------|-----------------------|-----------------|--------------------------|----------------------|
| <b>EBE_868-A +<br/>TAL868</b>       | <b>EBE_868-T +<br/>TAL868</b>       | -39.0658              | 26.2165         | -1.4901                  | 0.1362               |
| <b>EBE_868-C +<br/>TAL868</b>       | <b>EBE_868-T +<br/>TAL868</b>       | -72.8951              | 26.2165         | -2.7805                  | 0.0054               |
| <b>EBE_868-G +<br/>TAL868</b>       | <b>EBE_868-T +<br/>TAL868</b>       | -71.5824              | 27.6766         | -2.5864                  | 0.0097               |
| <b>EBE_868-A +<br/>TAL868 W232N</b> | <b>EBE_868-T +<br/>TAL868 W232N</b> | -17.4261              | 37.9669         | -0.459                   | 0.6462               |
| <b>EBE_868-C +<br/>TAL868 W232N</b> | <b>EBE_868-T +<br/>TAL868 W232N</b> | -37.1038              | 37.9669         | -0.9773                  | 0.3284               |
| <b>EBE_868-G +<br/>TAL868 W232N</b> | <b>EBE_868-T +<br/>TAL868 W232N</b> | -17.2847              | 37.9669         | -0.4553                  | 0.6489               |
| <b>EBE_868-A +<br/>TAL868 W232P</b> | <b>EBE_868-T +<br/>TAL868 W232P</b> | 7.4455                | 30.9998         | 0.2402                   | 0.8102               |
| <b>EBE_868-C +<br/>TAL868 W232P</b> | <b>EBE_868-T +<br/>TAL868 W232P</b> | 1.4639                | 30.9998         | 0.0472                   | 0.9623               |
| <b>EBE_868-G +<br/>TAL868 W232P</b> | <b>EBE_868-T +<br/>TAL868 W232P</b> | 12.0584               | 31.5832         | 0.3818                   | 0.7026               |
| <b>EBE_868-A +<br/>TAL868 W232Q</b> | <b>EBE_868-T +<br/>TAL868 W232Q</b> | -27.5133              | 30.9998         | -0.8875                  | 0.3748               |
| <b>EBE_868-C +<br/>TAL868 W232Q</b> | <b>EBE_868-T +<br/>TAL868 W232Q</b> | -45.9583              | 30.9998         | -1.4825                  | 0.1382               |
| <b>EBE_868-G +<br/>TAL868 W232Q</b> | <b>EBE_868-T +<br/>TAL868 W232Q</b> | -10.6222              | 30.9998         | -0.3427                  | 0.7319               |
| <b>EBE_868-A +<br/>TAL868 W232R</b> | <b>EBE_868-T +<br/>TAL868 W232R</b> | -12.7718              | 26.8466         | -0.4757                  | 0.6343               |
| <b>EBE_868-C +<br/>TAL868 W232R</b> | <b>EBE_868-T +<br/>TAL868 W232R</b> | -19.5424              | 26.8466         | -0.7279                  | 0.4667               |
| <b>EBE_868-G +</b>                  | <b>EBE_868-T +</b>                  | -5.4043               | 26.8466         | -0.2013                  | 0.8405               |

|                                        |                                |          |         |         |        |
|----------------------------------------|--------------------------------|----------|---------|---------|--------|
| <b>TAL868 W232R</b>                    | TAL868 W232R                   |          |         |         |        |
| <b>EBE_868-A +<br/>TAL868 W232T</b>    | EBE_868-T +<br>TAL868 W232T    | -1.9085  | 30.9998 | -0.0616 | 0.9509 |
| <b>EBE_868-C +<br/>TAL868 W232T</b>    | EBE_868-T +<br>TAL868 W232T    | -30.5213 | 30.9998 | -0.9846 | 0.3248 |
| <b>EBE_868-G +<br/>TAL868 W232T</b>    | EBE_868-T +<br>TAL868 W232T    | -25.0901 | 30.9998 | -0.8094 | 0.4183 |
| <b>EBE_PthXo1-A +<br/>PthXo1</b>       | EBE_PthXo1-T +<br>PthXo1       | -10.56   | 19.0896 | -0.5532 | 0.5801 |
| <b>EBE_PthXo1-C +<br/>PthXo1</b>       | EBE_PthXo1-T +<br>PthXo1       | -26.1776 | 19.0896 | -1.3713 | 0.1703 |
| <b>EBE_PthXo1-G +<br/>PthXo1</b>       | EBE_PthXo1-T +<br>PthXo1       | -20.0229 | 19.0896 | -1.0489 | 0.2942 |
| <b>EBE_PthXo1-A +<br/>PthXo1 W232N</b> | EBE_PthXo1-T +<br>PthXo1 W232N | -6.1063  | 27.2481 | -0.2241 | 0.8227 |
| <b>EBE_PthXo1-C +<br/>PthXo1 W232N</b> | EBE_PthXo1-T +<br>PthXo1 W232N | -8.2945  | 27.2235 | -0.3047 | 0.7606 |
| <b>EBE_PthXo1-G +<br/>PthXo1 W232N</b> | EBE_PthXo1-T +<br>PthXo1 W232N | 24.6582  | 27.2235 | 0.9058  | 0.3651 |
| <b>EBE_PthXo1-A +<br/>PthXo1 W232P</b> | EBE_PthXo1-T +<br>PthXo1 W232P | 26.1908  | 21.5637 | 1.2146  | 0.2245 |
| <b>EBE_PthXo1-C +<br/>PthXo1 W232P</b> | EBE_PthXo1-T +<br>PthXo1 W232P | 37.3488  | 21.5637 | 1.732   | 0.0833 |
| <b>EBE_PthXo1-G +<br/>PthXo1 W232P</b> | EBE_PthXo1-T +<br>PthXo1 W232P | 35.6093  | 21.5637 | 1.6513  | 0.0987 |
| <b>EBE_PthXo1-A +<br/>PthXo1 W232Q</b> | EBE_PthXo1-T +<br>PthXo1 W232Q | 10.9427  | 26.8466 | 0.4076  | 0.6836 |
| <b>EBE_PthXo1-C +<br/>PthXo1 W232Q</b> | EBE_PthXo1-T +<br>PthXo1 W232Q | 13.3468  | 26.8466 | 0.4971  | 0.6191 |
| <b>EBE_PthXo1-G +<br/>PthXo1 W232Q</b> | EBE_PthXo1-T +<br>PthXo1 W232Q | 94.0353  | 26.8466 | 3.5027  | 0.0005 |
| <b>EBE_PthXo1-A +<br/>PthXo1 W232R</b> | EBE_PthXo1-T +<br>PthXo1 W232R | 67.5683  | 30.9998 | 2.1796  | 0.0293 |
| <b>EBE_PthXo1-C +</b>                  | EBE_PthXo1-T +                 | 39.9221  | 30.9998 | 1.2878  | 0.1978 |

|                                    |                             |         |         |        |        |
|------------------------------------|-----------------------------|---------|---------|--------|--------|
| <b>PthXo1 W232R</b>                | PthXo1 W232R                |         |         |        |        |
| <b>EBE_PthXo1-G + PthXo1 W232R</b> | EBE_PthXo1-T + PthXo1 W232R | 1.1782  | 30.9998 | 0.038  | 0.9697 |
| <b>EBE_PthXo1-A + PthXo1 W232T</b> | EBE_PthXo1-T + PthXo1 W232T | 11.1258 | 21.4063 | 0.5197 | 0.6032 |
| <b>EBE_PthXo1-C + PthXo1 W232T</b> | EBE_PthXo1-T + PthXo1 W232T | 6.3498  | 21.4063 | 0.2966 | 0.7667 |
| <b>EBE_PthXo1-G + PthXo1 W232T</b> | EBE_PthXo1-T + PthXo1 W232T | 17.8609 | 21.4063 | 0.8344 | 0.4041 |

<sup>1</sup> Estimated difference between the effect sizes of Treatment A and Treatment B on GUS activity. Estimate<0 indicates the Treatment A has a smaller effect on GUS activity than treatment B. Estimate>0 indicates that Treatment A has a larger effect on GUS activity than Treatment B.

<sup>2</sup> Standard Error for the estimated difference in effect sizes computed by the general linear hypothesis test.

<sup>3</sup> Z statistic For the general linear hypothesis test of the null hypothesis that the expected value of the effect size of Treatment A is equal to the expected value of the effect size of Treatment B.

<sup>4</sup> p-value for the general linear hypothesis test of the null hypothesis that the expected value of the effect size of Treatment A is equal to the expected value of the effect size of Treatment B.
